# Supplementary material
Source: ML conference proceedings conference paper supplement (https://proceedings.mlr.press/v89/jia19a.html)
Supplement: Supplementary file 1 [file jia19a-supp.pdf]

---

## Supplementary Material: Towards Efficient Data Valuation Based on the Shapley Value

---

**Ruoxi Jia<sup>1\*</sup>, David Dao<sup>2\*</sup>, Boxin Wang<sup>3</sup>, Frances Ann Hubis<sup>2</sup>, Nick Hynes<sup>1</sup>,  
Nezihe Merve Gurel<sup>2</sup>, Bo Li<sup>4</sup>, Ce Zhang<sup>2</sup>, Dawn Song<sup>1</sup>, Costas Spanos<sup>1</sup>**

<sup>1</sup>University of California at Berkeley, <sup>2</sup>ETH, Zurich

<sup>3</sup>Zhejiang University, <sup>4</sup>University of Illinois at Urbana-Champaign

## 1 Proof of Lemma 1

**Lemma 1.** For any  $i, j \in I$  and  $i \neq j$ , the difference in Shapley values between  $i$  and  $j$  is

$$s_i - s_j = \frac{1}{N-1} \sum_{S \subseteq I \setminus \{i,j\}} \frac{1}{\binom{N-2}{|S|}} [U(S \cup \{i\}) - U(S \cup \{j\})]$$

*Proof.*

$$\begin{aligned} s_i - s_j &= \sum_{S \subseteq I \setminus \{i\}} \frac{|S|!(N-|S|-1)!}{N!} [U(S \cup \{i\}) - U(S)] - \sum_{S \subseteq I \setminus \{j\}} \frac{|S|!(N-|S|-1)!}{N!} [U(S \cup \{j\}) - U(S)] \\ &= \sum_{S \subseteq I \setminus \{i,j\}} \frac{|S|!(N-|S|-1)!}{N!} [U(S \cup \{i\}) - U(S \cup \{j\})] + \sum_{S \in \{T | T \subseteq I, i \notin T, j \in T\}} \frac{|S|!(N-|S|-1)!}{N!} [U(S \cup \{i\}) - U(S)] \\ &\quad - \sum_{S \in \{T | T \subseteq I, i \in T, j \notin T\}} \frac{|S|!(N-|S|-1)!}{N!} [U(S \cup \{j\}) - U(S)] \\ &= \sum_{S \subseteq I \setminus \{i,j\}} \frac{|S|!(N-|S|-1)!}{N!} [U(S \cup \{i\}) - U(S \cup \{j\})] \\ &\quad + \sum_{S' \subseteq I \setminus \{i,j\}} \frac{(|S'|+1)!(N-|S'|-2)!}{N!} [U(S' \cup \{i\}) - U(S' \cup \{j\})] \\ &= \sum_{S \subseteq I \setminus \{i,j\}} \left( \frac{|S|!(N-|S|-1)!}{N!} + \frac{(|S|+1)!(N-|S|-2)!}{N!} \right) \cdot [U(S \cup \{i\}) - U(S \cup \{j\})] \\ &= \frac{1}{N-1} \sum_{S \subseteq I \setminus \{i,j\}} \frac{1}{C_{N-2}^{|S|}} [U(S \cup \{i\}) - U(S \cup \{j\})]. \end{aligned}$$

□

Loosely speaking, the proof distinguishes subsets  $S$  which include neither  $i$  nor  $j$  (such that the subset utility  $U(S)$  of the marginal contribution directly cancels) and subsets including either  $i$  or  $j$ . In the latter case,  $S$  can be partitioned to a mock subset  $S'$  by excluding the respective point from  $S$  such that a common sum over  $S'$  again eliminates all terms other than  $U(S' \cup \{i\}) - U(S' \cup \{j\})$ .

## 2 Proof of Lemma 2

**Lemma 2.** Suppose that  $C_{ij}$  is an  $(\epsilon/(2\sqrt{N}), \delta/(N(N-1)))$ -approximation to  $s_i - s_j$ . Then, the solution to the feasibility problem

$$\sum_{i=1}^N \hat{s}_i = U_{tot} \tag{1}$$

$$|(\hat{s}_i - \hat{s}_j) - C_{i,j}| \leq \epsilon/(2\sqrt{N}) \quad \forall i, j \in \{1, \dots, N\} \tag{2}$$

is an  $(\epsilon, \delta)$ -approximation to  $s$  with respect to  $l_2$ -norm.

*Proof.* Let  $\epsilon' = \epsilon/(2\sqrt{N})$ . Assume that  $\hat{s}_i - s_i > \epsilon/\sqrt{N}$ . Let  $\hat{s}_i - s_i = c\epsilon'$  where  $c > 2$ .

Since  $C_{i,j}$  is an  $(\epsilon', \delta/(N(N-1)))$ -approximation to  $s_i - s_j$ , we have that with probability at least  $1 - \delta/(N(N-1))$ ,

$$|(s_i - s_j) - C_{i,j}| \leq \epsilon' \tag{3}$$

Moreover, the inequality (2) implies that

$$|(\hat{s}_i - \hat{s}_j) - C_{i,j}| \leq \epsilon'$$

Therefore,

$$|\hat{s}_i - s_i + s_j - \hat{s}_j| = |\hat{s}_i - \hat{s}_j - C_{i,j} - (s_i - s_j - C_{i,j})| \quad (4)$$

$$\leq |\hat{s}_i - \hat{s}_j - C_{i,j}| + |s_i - s_j - C_{i,j}| \quad (5)$$

$$\leq 2\epsilon' \quad (6)$$

with probability at least  $1 - \delta/(N(N-1))$ . By the assumption that  $\hat{s}_i - s_i = c\epsilon'$  and  $c > 2$ , we have

$$(c-2)\epsilon' \leq \hat{s}_j - s_j \leq (c+2)\epsilon' \quad (7)$$

which further implies that  $\hat{s}_j - s_j > 0$  for some  $j \neq i$ . Thus, with probability  $1 - \delta/N$ , we have  $\hat{s}_j - s_j > 0$  for all  $j \neq i$ .

Then,

$$\sum_{j=1}^N (\hat{s}_j - s_j) = \sum_{j \neq i} (\hat{s}_j - s_j) + (\hat{s}_i - s_i) > 0 \quad (8)$$

Since  $\sum_{j=1}^N s_j = U_{\text{tot}}$ , it follows that  $\sum_{j=1}^N \hat{s}_j > U_{\text{tot}}$ , which contradicts with the fact that  $\hat{s}_j$  ( $j = 1, \dots, N$ ) is a solution to the feasibility problem (1) and (2).

The contradiction can be similarly established for  $s_i - \hat{s}_i = c\epsilon'$ . Therefore, we have that with probability at least  $1 - \delta/N$ ,  $|s_i - \hat{s}_i| \leq 2\epsilon'$  for some  $i$ . This in turn implies that with probability at least  $1 - \delta$ ,  $\|\hat{s} - s\|_\infty \leq 2\epsilon' = \epsilon/\sqrt{N}$ . Moreover, since  $\|\hat{s} - s\|_2 \leq \sqrt{N}\|\hat{s} - s\|_\infty = \epsilon$ , we have that  $\|\hat{s} - s\|_2 \leq \epsilon$  with probability at least  $1 - \delta$ .  $\square$

### 3 Proof of Theorem 3

We prove Theorem 3, which specifies a lower bound on the number of tests needed for achieving a certain approximation error. Before delving into the proof, we first present a lemma that is useful for establishing the bound in Theorem 3.

**Lemma 3** (Bennett's inequality [1]). *Given independent zero-mean random variables  $X_1, \dots, X_n$  satisfying the condition  $|X_i| \leq a$ , let  $\sigma^2 = \sum_{i=1}^n \sigma_i^2$  be the total variance. Then for any  $t \geq 0$ ,*

$$P[S_n > t] \leq \exp\left(-\frac{\sigma^2}{a^2} h\left(\frac{at}{\sigma^2}\right)\right)$$

where  $h(u) = (1+u)\log(1+u) - u$ .

We now restate Theorem 3 and proceed to the main proof.

**Theorem 3.** *Algorithm 1 returns an  $(\epsilon, \delta)$ -approximation to the Shapley value with respect to  $l_2$ -norm if the number of tests  $T$  satisfies  $T \geq 8 \log \frac{N(N-1)}{2\delta} / \left( (1 - q_{\text{tot}}^2) h\left(\frac{\epsilon}{Zr\sqrt{N}(1 - q_{\text{tot}}^2)}\right) \right)$ , where  $q_{\text{tot}} = \frac{N-2}{N}q(1) + \sum_{k=2}^{N-1} q(k)\left[1 + \frac{2k(k-N)}{N(N-1)}\right]$ ,  $h(u) = (1+u)\log(1+u) - u$ ,  $Z = 2 \sum_{k=1}^{N-1} \frac{1}{k}$ , and  $r$  is the range of the utility function.*

*Proof.* By Lemma 1, the difference in Shapley values between points  $i$  and  $j$  is given as

$$\begin{aligned} s_i - s_j &= \frac{1}{N-1} \sum_{S \subseteq I \setminus \{i,j\}} \frac{1}{C_{N-2}^{|S|}} \left[ U(S \cup \{i\}) - U(S \cup \{j\}) \right] \\ &= \frac{1}{N-1} \sum_{k=0}^{N-2} \frac{1}{C_{N-2}^k} \sum_{S \subseteq I \setminus \{i,j\}, |S|=k} \left[ U(S \cup \{i\}) - U(S \cup \{j\}) \right]. \end{aligned}$$

Let  $\beta_1, \dots, \beta_N$  denote  $N$  Boolean random variables drawn with the following sampler:

1. Sample the ‘‘length of the sequence’’  $\sum_{i=1}^N \beta_i = k \in \{1, 2, \dots, N-1\}$ , with probability  $q(k)$ .

2. Uniformly sample a length- $k$  sequence from  $\binom{N}{k}$  all possible length- $k$  sequences

Then the probability of any given sequence  $\beta_1, \dots, \beta_N$  is

$$P[\beta_1, \dots, \beta_N] = \frac{q(\sum_{i=1}^N \beta_i)}{C_N^{\sum_{i=1}^N \beta_i}}.$$

Now, we consider any two data points  $x_i$  and  $x_j$  where  $i, j \in I = \{1, \dots, N\}$  and their associated Boolean variables  $\beta_i$  and  $\beta_j$ , and analyze

$$\Delta = \beta_i U(\beta_1, \dots, \beta_N) - \beta_j U(\beta_1, \dots, \beta_N)$$

Consider the expectation of  $\Delta$ . Obviously, only  $\beta_i \neq \beta_j$  has non-zero contributions:

$$\begin{aligned} \mathbb{E}[\Delta] &= \sum_{k=0}^{N-2} \frac{q(k+1)}{C_N^{k+1}} \sum_{S \subseteq I \setminus \{i, j\}, |S|=k} [U(\beta_1, \dots, \beta_{i-1}, 1, \beta_{i+1}, \dots, \beta_{j-1}, 0, \beta_{j+1}, \dots, \beta_N) \\ &\quad - U(\beta_1, \dots, \beta_{i-1}, 0, \beta_{i+1}, \dots, \beta_{j-1}, 1, \beta_{j+1}, \dots, \beta_N)] \\ &= \sum_{k=0}^{N-2} \frac{q(k+1)}{C_N^{k+1}} \sum_{S \subseteq I \setminus \{i, j\}, |S|=k} [U(S \cup \{i\}) - U(S \cup \{j\})] \end{aligned}$$

We would like to have  $Z\mathbb{E}[\Delta] = s_i - s_j$

$$Z \frac{q(k+1)}{C_N^{k+1}} = \frac{1}{(N-1)C_{N-2}^k}$$

which yields

$$q(k+1) = \frac{N}{Z(k+1)(N-k-1)} = \frac{1}{Z} \left( \frac{1}{k+1} + \frac{1}{N-k-1} \right)$$

for  $k = 0, \dots, N-2$ . Equivalently,

$$q(k) = \frac{1}{Z} \left( \frac{1}{k} + \frac{1}{N-k} \right)$$

for  $k = 1, \dots, N-1$ . The value of  $Z$  is given by

$$Z = \sum_{k=1}^{N-1} \left( \frac{1}{k} + \frac{1}{N-k} \right) = 2 \sum_{k=1}^{N-1} \frac{1}{k} \leq 2(\log(N-1) + 1)$$

Now,  $\mathbb{E}[Z\Delta] = s_i - s_j$ . Assume that the utility function ranges from  $[0, r]$ ; then, we know from (??) that  $Z\Delta$  is random variable ranges in  $[-Zr, Zr]$ .

Consider

$$\Delta := \beta_i U(\beta_1, \dots, \beta_N) - \beta_j U(\beta_1, \dots, \beta_N)$$

Note that  $\Delta = 0$  when  $\beta_i = \beta_j$ . If  $P[\beta_i = \beta_j]$  is large, then the variance of  $\Delta$  will be much smaller than its range.

$$\begin{aligned} P[\beta_i = \beta_j] &= P[\beta_i = 1, \beta_j = 1] + P[\beta_i = 0, \beta_j = 0] \\ &= \left[ \sum_{k=2}^{N-1} \frac{q(k)}{C_N^k} C_{N-2}^{k-2} \right] + \left[ q(1) + \sum_{k=2}^{N-1} \frac{q(k)}{C_N^k} C_{N-2}^k \right] \end{aligned}$$

$$= \frac{N-2}{N}q(1) + \sum_{k=2}^{N-1} q(k) \left[ 1 + \frac{2k(k-N)}{N(N-1)} \right] \equiv q_{tot}$$

Let  $W = \mathbb{1}[\Delta \neq 0]$  be an indicator of whether or not  $\Delta = 0$ . Then,  $P[W = 0] = q_{tot}$  and  $P[W = 1] = 1 - q_{tot}$ .

Now, we analyze the variance of  $\Delta$ . By the law of total variance,

$$\text{Var}[\Delta] = \mathbb{E}[\text{Var}[\Delta|W]] + \text{Var}[\mathbb{E}[\Delta|W]]$$

Recall  $\Delta \in [-r, r]$ . Then, the first term can be bounded by

$$\begin{aligned} \mathbb{E}[\text{Var}[\Delta|W]] &= P[W = 0]\text{Var}[\Delta|W = 0] + P[W = 1]\text{Var}[\Delta|W = 1] \\ &= q_{tot}\text{Var}[\Delta|\Delta = 0] + (1 - q_{tot})\text{Var}[\Delta|\Delta \neq 0] \\ &= (1 - q_{tot})\text{Var}[\Delta|\Delta \neq 0] \\ &\leq (1 - q_{tot})r^2 \end{aligned}$$

where the last inequality follows from the fact that if a random variable is in the range  $[m, M]$ , then its variance is bounded by  $\frac{(M-m)^2}{4}$ .

The second term can be expressed as

$$\begin{aligned} \text{Var}[\mathbb{E}[\Delta|W]] &= \mathbb{E}_W[(\mathbb{E}[\Delta|W] - \mathbb{E}[\Delta])^2] \\ &= P[W = 0](\mathbb{E}[\Delta|W = 0] - \mathbb{E}[\Delta])^2 + P[W = 1](\mathbb{E}[\Delta|W = 1] - \mathbb{E}[\Delta])^2 \\ &= q_{tot}(\mathbb{E}[\Delta|\Delta = 0] - \mathbb{E}[\Delta])^2 + (1 - q_{tot})(\mathbb{E}[\Delta|\Delta \neq 0] - \mathbb{E}[\Delta])^2 \\ &= q_{tot}(\mathbb{E}[\Delta])^2 + (1 - q_{tot})(\mathbb{E}[\Delta|\Delta \neq 0] - \mathbb{E}[\Delta])^2 \end{aligned} \tag{9}$$

Note that

$$\begin{aligned} \mathbb{E}[\Delta] &= P[W = 0]\mathbb{E}[\Delta|\Delta = 0] + P[W = 1]\mathbb{E}[\Delta|\Delta \neq 0] \\ &= (1 - q_{tot})\mathbb{E}[\Delta|\Delta \neq 0] \end{aligned} \tag{10}$$

Plugging (10) into (9), we obtain

$$\text{Var}[\mathbb{E}[\Delta|W]] = (q_{tot}(1 - q_{tot})^2 + q_{tot}^2(1 - q_{tot}))(\mathbb{E}[\Delta|\Delta \neq 0])^2$$

Since  $|\Delta| \leq r$ ,  $(\mathbb{E}[\Delta|\Delta \neq 0])^2 \leq r^2$ . Therefore,

$$\text{Var}[\mathbb{E}[\Delta|W]] \leq q_{tot}(1 - q_{tot})r^2$$

It follows that

$$\text{Var}[\Delta] \leq (1 - q_{tot}^2)r^2$$

Given  $T$  samples, the application of Bennett's inequality in Lemma 3 yields

$$P \left[ \sum_{t=1}^T (Z\Delta_t - \mathbb{E}[Z\Delta_t]) > \epsilon' \right] \leq \exp \left( - \frac{T(1 - q_{tot}^2)}{4} h \left( \frac{2\epsilon'}{TZr(1 - q_{tot}^2)} \right) \right)$$

By letting  $\epsilon = \epsilon'/T$ ,

$$P[(Z\bar{\Delta} - \mathbb{E}[Z\Delta]) > \epsilon] \leq \exp \left( - \frac{T(1 - q_{tot}^2)}{4} h \left( \frac{2\epsilon}{Zr(1 - q_{tot}^2)} \right) \right)$$

Therefore, the number of tests  $T$  we need in order to get an  $(\epsilon/(2\sqrt{N}), \delta/(N(N-1)))$ -approximation to the difference of two Shapley values for a single pair of data points is

$$T \geq \frac{4}{(1 - q_{tot}^2)h\left(\frac{\epsilon}{Z\sqrt{N}r(1 - q_{tot}^2)}\right)} \log \frac{N(N-1)}{\delta}$$

By union bound, the number of tests  $T$  for achieving  $(\epsilon/\sqrt{N}, \delta/N)$ -approximation to the difference of the Shapley values for all  $N(N-1)/2$  pairs of data points is

$$T \geq \frac{8}{(1 - q_{tot}^2)h(\frac{\epsilon}{Z\sqrt{Nr}C_\epsilon(1 - q_{tot}^2)})} \log \frac{N(N-1)}{2\delta}$$

By Lemma 2, we approximate the Shapley value up to  $(\epsilon, \delta)$  with  $(\epsilon/\sqrt{N}, \delta/(N(N-1)))$  approximations to all  $N(N-1)/2$  pairs of data points.  $\square$

## 4 Proof of Theorem 4

**Theorem 4.** *There exists some constant  $C'$  such that if  $M \geq C'(K \log(N/(2K)) + \log(2/\delta))$  and  $T \geq \frac{2r^2}{\epsilon^2} \log \frac{4M}{\delta}$ , except for an event of probability no more than  $\delta$ , the output of Algorithm ?? obeys*

$$\|\hat{s} - s\|_2 \leq C_{1,K}\epsilon + C_{2,K} \frac{\sigma_K(s)}{\sqrt{K}} \quad (11)$$

for some constants  $C_{1,K}$  and  $C_{2,K}$ .

*Proof.* Due to the super-additivity of  $U(\cdot)$ ,  $\hat{y}_{m,t}$  can be lower bounded by  $-\frac{1}{\sqrt{M}} \sum_{i=1}^N U(P_i^{\pi_t} \cup \{i\}) - U(P_i^{\pi_t}) = -\frac{1}{\sqrt{M}}U(\pi_t) \geq -\frac{r}{\sqrt{M}}$ ; the upper bound can be similarly analyzed. Thus, the range of  $\hat{y}_{m,t}$  is  $[-1/\sqrt{M}r, 1/\sqrt{M}r]$ . Since  $\mathbb{E}[\hat{y}_{m,t}] = \sum_{i=1}^N A_{m,i} \mathbb{E}[U(P_i^{\pi_t} \cup \{i\}) - U(P_i^{\pi_t})] = \sum_{i=1}^N A_{m,i} s_i$  for all  $m = 1, \dots, M$ , an application of Hoeffding's bound gives

$$P[\|As - \bar{y}\|_2 \geq \epsilon] \leq P[\|As - \bar{y}\|_\infty \geq \frac{\epsilon}{\sqrt{M}}] \quad (12)$$

$$\leq \sum_{m=1}^M P[|A_m s - \bar{y}_m| \geq \frac{\epsilon}{\sqrt{M}}] \quad (13)$$

$$\leq 2M \exp(-\frac{\epsilon^2}{2r^2 T}) \quad (14)$$

Let  $s = \Delta s + \bar{s}$ . Thus,  $P[\|A(\bar{s} + \Delta s) - \bar{y}\|_2 \leq \epsilon]$  holds with probability at least  $\delta/2$  provided

$$T \geq \frac{2r^2}{\epsilon^2} \log \frac{4M}{\delta}. \quad (15)$$

By the random matrix theory, the restricted isometry constant of  $A$  satisfies  $\delta_{2K} \leq C_\delta = 0.465$  with probability at least  $1 - \delta/2$  if

$$M \geq CC_\delta^{-2}(2K \log(N/(2K)) + \log(2/\delta)) \quad (16)$$

where  $C > 0$  is a universal constant.

Applying the Theorem 2.7 in [3], we obtain that the output of Algorithm 2 satisfies

$$\|\hat{s} - s\| = \|\Delta s^* - \Delta s\| \leq C_{1,K}\epsilon + C_{2,K} \frac{\sigma_K(s)}{\sqrt{K}} \quad (17)$$

with probability at least  $1 - \delta$  provided that (15) holds and  $M \geq C'(K \log(N/(2K)) + \log(2/\delta))$  for some constant  $C'$ .  $\square$

## 5 Proof of Theorem 5

For the proof of Theorem 5 we need the following definition of a *stable utility function*.

**Definition 1.** A utility function  $U(\cdot)$  is called  $\lambda$ -stable if

$$\max_{i,j \in I, S \subseteq I \setminus \{i,j\}} |U(S \cup \{i\}) - U(S \cup \{j\})| \leq \frac{\lambda}{|S| + 1}$$

Then, Shapley values calculated from  $\lambda$ -stable utility functions have the following property.

**Proposition 1.** If  $U(\cdot)$  is  $\lambda$ -stable, then for all  $i, j \in I$  and  $i \neq j$

$$s_i - s_j \leq \frac{\lambda(1 + \log(N - 1))}{N - 1}$$

*Proof.* By Lemma 1, we have

$$s_i - s_j \leq \frac{1}{N - 1} \sum_{S \subseteq I \setminus \{i,j\}} \frac{1}{C_{N-2}^{|S|}} \frac{\lambda}{|S| + 1} = \frac{1}{N - 1} \sum_{|S|=0}^{N-2} \frac{\lambda}{|S| + 1}$$

Recall the bound on the harmonic sequences

$$\sum_{k=1}^N \frac{1}{k} \leq 1 + \log(N)$$

which gives us

$$s_i - s_j \leq \frac{\lambda(1 + \log(N - 1))}{N - 1}$$

□

Then, we can prove Theorem 5.

**Theorem 5.** For a learning algorithm  $A(\cdot)$  with uniform stability  $\beta = \frac{C_{stab}}{|S|}$ , where  $|S|$  is the size of the training set and  $C_{stab}$  is some constant. Let the utility of  $D$  be  $U(D) = M - L_{test}(A(D), D_{test})$ , where  $L_{test}(A(D), D_{test}) = \frac{1}{N} \sum_{i=1}^N l(A(D), z_{test,i})$  and  $0 \leq l(\cdot, \cdot) \leq M$ . Then,  $s_i - s_j \leq 2C_{stab} \frac{1 + \log(N-1)}{N-1}$  and the Shapley difference vanishes as  $N \rightarrow \infty$ .

*Proof.* For any  $i, j \in I$  and  $i \neq j$ ,

$$\begin{aligned} & |U(S \cup \{i\}) - U(S \cup \{j\})| \\ &= \left| \frac{1}{N} \sum_{i=1}^N [l(A(S \cup \{i\}), z_{test,i}) - l(A(S \cup \{j\}), z_{test,i})] \right| \\ &\leq \frac{1}{N} \sum_{i=1}^N |l(A(S \cup \{i\}), z_{test,i}) - l(A(S), z_{test,i})| + |l(A(S), z_{test,i}) - l(A(S \cup \{j\}), z_{test,i})| \\ &\leq \frac{1}{N} \sum_{i=1}^N \frac{2C_{stab}}{|S| + 1} = \frac{2C_{stab}}{|S| + 1} \end{aligned}$$

Combining the above inequality with Proposition 1 proves the theorem. □

## 6 Proof of Theorem 6

**Theorem 6.** Consider the value attribution scheme that assign the value  $\hat{s}(U, i) = C_U [U(S \cup \{i\}) - U(S)]$  to user  $i$  where  $|S| = N - 1$  and  $C_U$  is a constant such that  $\sum_{i=1}^N \hat{s}(U, i) = U(I)$ . Consider two utility functions  $U(\cdot)$  and  $V(\cdot)$ . Then,  $\hat{s}(U + V, i) \neq \hat{s}(U, i) + \hat{s}(V, i)$  unless  $V(I) [\sum_{i=1}^N U(S \cup \{i\}) - U(S)] = U(I) [\sum_{i=1}^N V(S \cup \{i\}) - V(S)]$ .

*Proof.* Consider two utility functions  $U(\cdot)$  and  $V(\cdot)$ . The values attributed to user  $i$  under these two utility functions are given by

$$\hat{s}(U, i) = C_U[U(S \cup \{i\}) - U(S)]$$

and

$$\hat{s}(V, i) = C_V[V(S \cup \{i\}) - V(S)]$$

where  $C_U$  and  $C_V$  are constants such that  $\sum_{i=1}^N \hat{s}(U, i) = U(I)$  and  $\sum_{i=1}^N \hat{s}(V, i) = V(I)$ . Now, we consider the value under the utility function  $W(S) = U(S) + V(S)$ :

$$\hat{s}(U + V, i) = C_W[U(S \cup \{i\}) - U(S) + V(S \cup \{i\}) - V(S)]$$

where

$$C_W = \frac{U(I) + V(I)}{\sum_{i=1}^N [U(S \cup \{i\}) - U(S) + V(S \cup \{i\}) - V(S)]}$$

Then,  $\hat{s}(U + V, i) = \hat{s}(U, i) + \hat{s}(V, i)$  if and only if  $C_U = C_V = C_W$ , which is equivalent to

$$V(I) \left[ \sum_{i=1}^N U(S \cup \{i\}) - U(S) \right] = U(I) \left[ \sum_{i=1}^N V(S \cup \{i\}) - V(S) \right]$$

□

## 7 Theoretical Results on the Baseline Permutation Sampling

Let  $\pi_t$  be a random permutation of  $D = \{z_i\}_{i=1}^N$  and each permutation has a probability of  $\frac{1}{N!}$ . Let  $\phi_i^t = U(P_i^{\pi_t} \cup \{i\}) - U(P_i^{\pi_t})$ , we consider the following estimator of  $s_i$ :

$$\hat{s}_i = \frac{1}{T} \sum_{t=1}^T \phi_i^t$$

**Theorem 2.** *Given the range of the utility function  $r$ , an error bound  $\epsilon$ , and a confidence  $1 - \delta$ , the sample size required such that*

$$P[\|\hat{s} - s\|_2 \geq \epsilon] \leq \delta$$

is

$$T \geq \frac{2r^2 N}{\epsilon^2} \log \frac{2N}{\delta}$$

*Proof.*

$$\begin{aligned} P[\max_{i=1, \dots, N} |\hat{s}_i - s_i| \geq \epsilon] &= P[\cup_{i=1, \dots, N} \{|\hat{s}_i - s_i| \geq \epsilon\}] \leq \sum_{i=1}^N P[|\hat{s}_i - s_i| \geq \epsilon] \\ &\leq 2N \exp\left(-\frac{2T\epsilon^2}{4r^2}\right) \end{aligned}$$

The first inequality follows from the union bound and the second one is due to Hoeffding's inequality. Since  $\|\hat{s} - s\|_2 \leq \sqrt{N} \|\hat{s} - s\|_\infty$ , we have

$$P[\|\hat{s} - s\|_2 \geq \epsilon] \leq P[\|\hat{s} - s\|_\infty \geq \epsilon/\sqrt{N}] \leq 2N \exp\left(-\frac{2T\epsilon^2}{4Nr^2}\right)$$

Setting  $2N \exp(-\frac{T\epsilon^2}{2Nr^2}) \leq \delta$  yields

$$T \geq \frac{2r^2 N}{\epsilon^2} \log \frac{2N}{\delta}$$

□

The permutation sampling-based method used as baseline in the experimental part of this work was adapted from Maleki et al. [2] and is presented in Algorithm 1.

---

**Algorithm 1:** Baseline: Permutation Sampling-Based Approach

---

**input** : Training set -  $D = \{(x_i, y_i)\}_{i=1}^N$ , utility function  $U(\cdot)$ , the number of measurements -  $M$ , the number of permutations -  $T$

**output** : The Shapley value of each training point -  $\hat{s} \in \mathbb{R}^N$

- 1 **for**  $t \leftarrow 1$  **to**  $T$  **do**
- 2      $\pi_t \leftarrow \text{GenerateUniformRandomPermutation}(D)$ ;
- 3      $\phi_i^t \leftarrow U(P_i^{\pi_t} \cup \{i\}) - U(P_i^{\pi_t})$  for  $i = 1, \dots, N$ ;
- 4 **end**
- 5  $\hat{s}_i = \frac{1}{T} \sum_{t=1}^T \phi_i^t$  for  $i = 1, \dots, N$ ;

---

**References**

- [1] G. Bennett. Probability inequalities for the sum of independent random variables. *Journal of the American Statistical Association*, 57(297):33–45, 1962.
- [2] S. Maleki, L. Tran-Thanh, G. Hines, T. Rahwan, and A. Rogers. Bounding the estimation error of sampling-based shapley value approximation. *arXiv preprint arXiv:1306.4265*, 2013.
- [3] H. Rauhut. Compressive sensing and structured random matrices. *Theoretical foundations and numerical methods for sparse recovery*, 9:1–92, 2010.
